# Supplementary material for: Environmental Drivers and Predicted Risk of Bacillary Dysentery in Southwest China
Source: PubMed Central journal article supplement (PMC5551220; doi:10.3390/ijerph14070782), 2017-07-14
Supplement: ijerph-14-00782-s001.pdf [file ijerph-14-00782-s001.pdf]

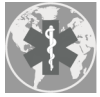

## Supplementary Materials

# Environmental Drivers and Predicted Risk of Bacillary Dysentery in Southwest China

Han Zhang, Yali Si, Xiaofeng Wang and Peng Gong

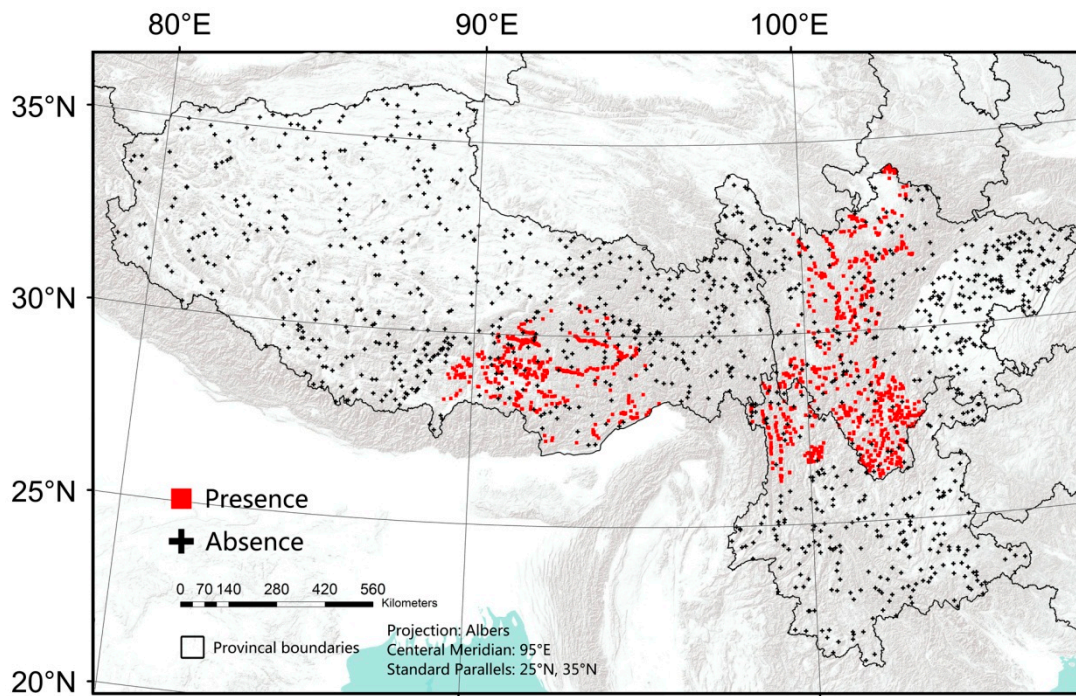

**Figure S1.** Example of a set of training samples (A total of 1000 training subsets were generated randomly in the bootstrapping logistic regression analyses.)

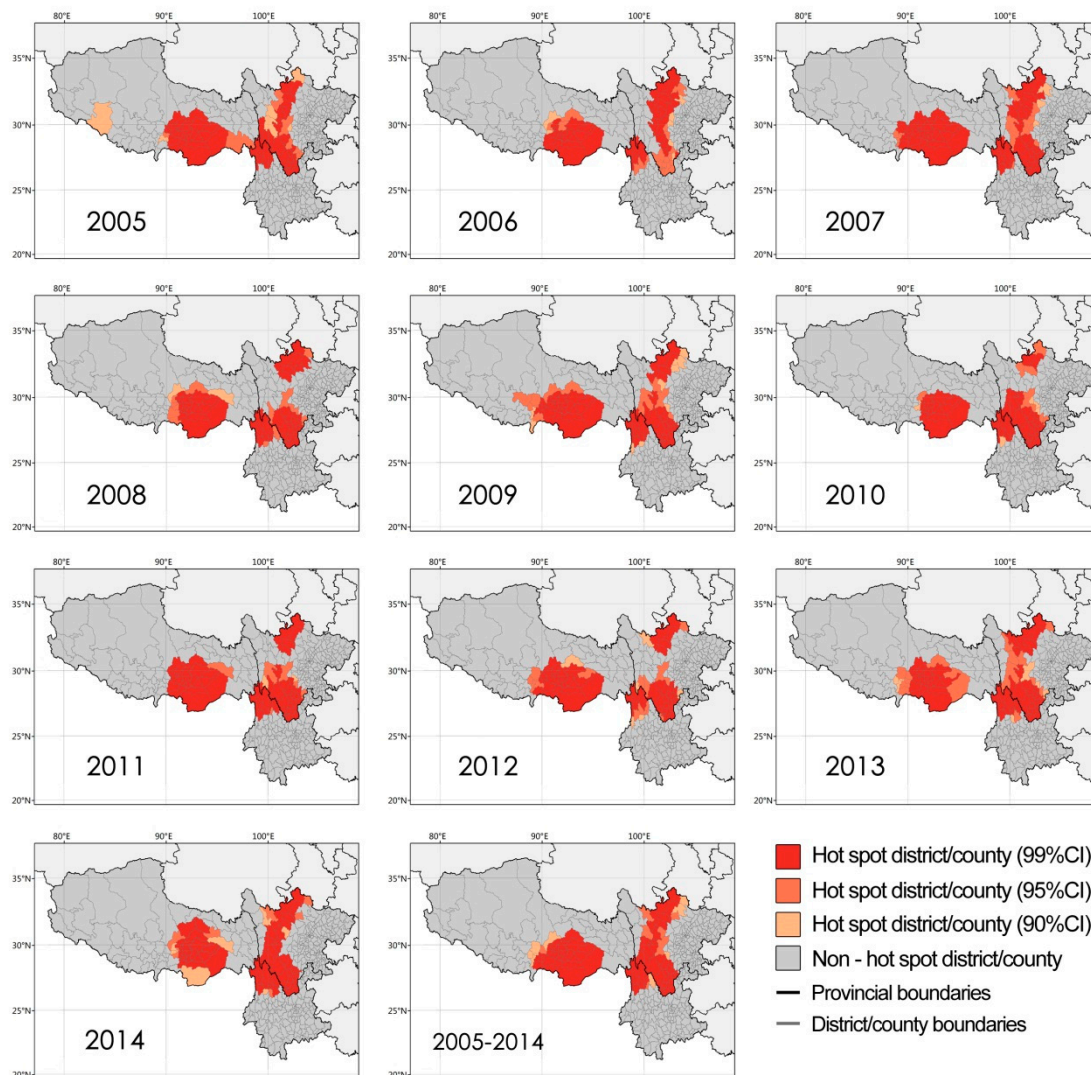

Figure S2. Distribution of hotspot districts/counties year by year during the study period.
